# Supplementary material for: Effects of self-selected versus motivational music on lower limb muscle strength and affective state in middle-aged adults
Source: PeerJ. 2022 Jul 22;10:e13795. doi: 10.7717/peerj.13795 (PMC9310772; doi:10.7717/peerj.13795)
Supplement: Supplemental Information 1 [file peerj-10-13795-s001.xlsx]

## Sheet: XSPSS
Age	Height	Weight	BMI	PALevel	RPE_SSMT0	RPE_RSMT0	RPE_CCT0	RPE_SSMT2	RPE_RSMT2	RPE_CCT2	FS_SSMT0	FS_RSMT0	FS_CCT0	FS_SSMT2	FS_RSMT2	FS_CCT2	FS_SSMT5	FS_RSMT5	FS_CCT5	FAS_SSMT0	FAS_RSMT0	FAS_CCT0	FAS_SSMT1	FAS_RSMT1	FAS_CCT1	MaxForce_SSM	MaxForce_RSM	MaxForce_CC	RFD_SSM	RFD_RSM	RFD_CC	mean12_SSM	Pfat_SSM	mean12_RSM	Pfat_RSM	mean12_CC	Pfat_CC
65	162	80.7	30.7	0	0	0	0	2	3	3	3	5	3	3	1	1	3	3	3	5	2	3	4	3	3	456.4	435.733	447.8	5662.45	4650.28	5957.17	405.34	15.835	409.881	8.42036	422.426	13.5306
45	164	89.6	33.3	1720	0	0	0	3	4	5	5	5	5	5	5	5	5	5	5	1	1	2	3	2	2	657.93	616.11	612.38	5576.6	7524.81	5484.23	601.839	17.2804	573.104	4.27634	595.656	8.86844
60	184	93.4	27.6	5480	0	0	0	2	3	5	3	3	3	3	3	3	3	3	3	3	3	3	3	3	3	619.06	565.177	608	3947.1	3904.62	2922.1	577.278	13.0641	478.724	19.9176	554.337	8.32928
47	173	82.5	27.6	1200	0	0	0	5	4	4	0	0	0	5	3	3	3	3	3	1	1	1	2	1	2	413.475	431	430.435	5742.9	6926.83	5549.47	385.412	9.22395	382.515	19.4017	388.04	19.3189
43	167.5	73.1	26.1	1840	0	0	0	3	2	1	0	1	-1	3	-1	0	3	1	1	1	1	1	2	2	1	568.8	504.233	592.167	5747.38	5464.29	4965.75	489.123	27.7648	433.702	29.8515	517.706	20.2947
39	178	73.8	23.3	1760	0	0	0	7	6	7	2	1	1	2	-1	0	5	2	1	1	1	2	3	3	2	543.05	531.333	495.433	6936.81	6697.65	5525.94	437.33	26.0741	429.777	15.4958	428.616	18.7165
54	170.5	70.5	24.3	480	0	0	0	3	2.5	1	3	4	3	3	3	3	4	4	3	3	3	3	5	5	3	426.2	390.667	454.6	4109.81	4188	2181.87	369.208	16.0655	321.626	30.8272	385.879	21.9672
55	173	89.2	29.8	1020	0	0	0	1	2	1	5	5	5	4	5	4	4	5	4	5	4	5	5	6	4	371.7	352.997	381.565	4109.81	4188	2181.87	329.937	3.84398	299.328	9.15726	294.736	11.2015
40	166	74.8	27.2	1640	0	0	0	3	5	3	4	5	5	4	3	3	5	5	5	4	1	1	4	3	3	479.2	467	404.825	7405.94	7571.57	6457.57	430.08	9.23263	441.188	8.82803	416.668	12.9266
59	175	98.9	32.3	480	0	0	0	0.5	1	2	3	3	3	3	3	3	3	3	3	4	1	3	4	3	3	436.443	404.933	456.867	3462.93	4154.89	4528.54	375.752	19.0388	335.042	15.8335	396.584	26.6482
60	171	68.4	23.4	2760	0	0	0	5	5	5	5	3	3	5	3	3	5	3	3	3	3	3	4	4	4	502.483	472.22	492.773	2931.95	1220.65	2112.41	450.428	8.14536	425.486	12.9412	456.659	9.87731
61	165	65	23.8	1540	0	0	0	5	5	5	4	5	5	3	3	2	4	4	3	4	6	5	5	5	4	379.05	344.767	361.067	2248.53	2882.74	2343.7	349.843	10.1339	307.548	8.41245	306.885	15.9
50	170	75.6	26.2	900	0	0	0	2	1	3	3	2	4	4	2	3	5	1	3	3	4	5	4	4	3	677.825	664.78	666.985	6540.97	7067.84	4916.97	561.783	16.2762	557.563	11.4282	573.866	17.5677
52	182	104.6	31.6	0	0	0	0	2	2	1	3	3	5	5	5	5	5	5	5	5	5	6	6	6	6	440.76	392.1	382.547	6295.39	4852.23	6496.34	373.862	8.35453	340.137	18.7538	343.448	12.7582
52	174	80.1	26.5	2280	0	0	0	0.5	1	1	5	3	5	5	3	5	5	3	5	3	4	3	3	3	3	338.337	323.273	312.98	4894.19	1758.35	2682.94	323.909	6.72469	294.127	15.9501	286.303	9.05869
58	179	78.4	24.5	260	0	0	0	4	4	3	3	3	5	4	3	1	4	3	3	2	3	2	3	4	3	446.237	444.68	445.23	4646.69	3593.33	4506.78	368.723	25.0867	391.445	22.3675	373.699	24.1219
43	184	76.5	22.5957	1560	0	0	0	3	3	2.5	2	1	3	4	1	2	3	1	2	3	1	2	3	2	2	653.03	720	600.2	3919.7	4742	2907.7	642.6	10.3796	583.783	7.29962	579.05	9.08365
39	183	71	21.201	2780	0	0	1	1.5	2.5	1	3	3	3	4	2	2	4	3	1	3	2	1	4	2	2	736.13	709.3	609.7	2571	950.7	1042.7	667.483	20.4076	607.242	9.03156	609.2	7.41385
56	178	78.5	24.7759	900	0	0	0	3	5	4	3	3	3	3	3	3	3	3	3	3	3	3	3	3	3	701.5	806.1	648.5	3053	3651.7	2089.3	561.625	17.98	617.433	12.378	522.183	19.5391
59	175	82	26.7755	1080	0	0	0	3	7	3	1	3	1	3	3	1	1	2	1	2	2	3	3	4	3	607.1	654.6	690.5	2904.7	2882.3	2758	562.167	28.743	566.35	7.17352	465.133	20.5266
45	186	80	23.1241	1120	0	0	0	5	5	3	4	3	3	5	4	3	4	5	4	5	5	4	6	5	5	833.4	825.5	729	2730	1092.7	3617	753.183	15.7	695.85	13.6	707.508	15.9
55	170	72	24.9135	1740	0	0	0	5	2	3	0	0	1	3	0	3	3	-1	3	2	1	1	4	1	2	607.5	533.4	627.8	2185	1421.3	2366.3	552.592	13.5018	497.775	7.00301	576.45	16.5888
37	183	78	23.2912	3280	0	1	0.3	8	9	7	2	3	1	3	3	3	3	3	3	2	1	2	2	1	2	703.8	681.9	728.1	4896.3	4213.3	4582	623.3	0.663927	636.9	7.0105	628	14.5763
51	173	63	21.0498	320	0	0	0	3	3	3	3	2	3	4	1	1	5	1	2	2	2	1	3	1	1	533.9	428.3	462.2	3122.7	1606.8	2031.7	576.8	21.1331	514.4	13.5596	505.5	16.9448
38	183	81	24.187	2640	0	0	0	1.5	1	2	5	4	3	5	3	4	5	4	4	6	4	5	6	5	5	777.8	499.9	713.4	5212.6	5215.6	6952.6	756.4	24.9421	614.9	15.8661	606.9	22.6516
58	180	74	22.8395	960	0	0	0	3	5	6	3	2	0	4	3	3	4	3	3	3	1	1	4	2	1	655.3	439.3	705.7	4631.7	5840.7	5434.7	662.225	23.0153	627.7	9.07463	658.8	18.9584
