# Supplementary material for: Effects of self-selected versus motivational music on lower limb muscle strength and affective state in middle-aged adults
Source: PeerJ journal article supplement (doi:10.7717/peerj.13795), 2022-07-22
Supplement: Supplemental_Data_S1.pdf [file Supplemental_Data_S1.pdf]

| <b>SONG TITLE</b>            | <b>ARTIST</b>         | <b>BPM</b> |
|------------------------------|-----------------------|------------|
| 30/30-150                    | Stone Sour            | 163        |
| 50 Special                   | The pop moon group    | 80         |
| A mano a mano                | Rino Gaetano          | 88         |
| A Sky Full of Stars          | Coldplay              | 125        |
| Acqua azzurra, acqua chiara  | Lucio Battisti        | 92         |
| Aeroplane                    | Red Hot Chili Peppers | 101        |
| Aida                         | Rino Gaetano          | 73         |
| All Along the Watchtower     | Jimi Hendrix          | 113        |
| Always                       | Bon Jovi              | 71         |
| Andromeda                    | Elodie                | 122        |
| Another Day in Paradise      | Phil Collins          | 102        |
| Back in Black                | AC/DC                 | 94         |
| Back in Black                | AC/DC                 | 94         |
| Berta Filava                 | Rino Gaetano          | 114        |
| Better think again           | Submersed             | 100        |
| Billie Jean                  | Michael Jackson       | 117        |
| Bocca di rosa                | Fabrizio De André     | 118        |
| Bohemian Rhapsody            | Queen                 | 72         |
| Born in the U.S.A.           | Bruce Springsteen     | 122        |
| Born tu Run                  | Bruce Springsteen     | 73         |
| Breaking Me                  | Topic & A7S           | 122        |
| Bring me to life             | Evanescence           | 95         |
| Cake by the Ocean            | DNCE                  | 119        |
| Can't Stop                   | Red Hot Chili Peppers | 91         |
| Can't get you out of my head | Kylie Minogue         | 63         |
| Children                     | Robert Miles          | 137        |
| Coming for You               | The Offspring         | 139        |
| Cosa ti aspetti da me        | Loredana Bertè        | 93         |
| Counting Stars               | OneRepublic           | 122        |
| Crazy                        | Aerosmith             | 81         |

|                                    |                               |     |
|------------------------------------|-------------------------------|-----|
| Dance with the dead                | Axxis                         | 180 |
| Dancing in the dark                | Bruce Springsteen             | 149 |
| Dangerous                          | David Guetta feat. Sam Martin | 92  |
| Diamonds                           | Sam Smith                     | 104 |
| Dolcenera                          | Fabrizio De André             | 126 |
| Don Raffaè                         | Fabrizio De André             | 128 |
| Don't Stop Me Now                  | Queen                         | 156 |
| Don't worry                        | Madcon feat. Ray Dalton 71    | 123 |
| Don't stop me now                  | Queen                         | 156 |
| Don't you want me                  | The Human League              | 118 |
| Duality                            | Slipknot                      | 144 |
| E cantava le canzoni               | Rino Gaetano                  | 116 |
| El Pueblo Unido jamas sera vencido | Banda Bassotti                | 140 |
| Eye of the tiger                   | Survivor                      | 109 |
| Eye of the Tiger                   | Survivor                      | 109 |
| Figli del Vento                    | Raphael Gualazzi              | 90  |
| Fire Your Guns                     | AC/DC                         | 99  |
| Fly Away                           | Tones And I                   | 125 |
| Fortunate Son                      | Creedence Clearwater Reviva   | 133 |
| Fuck authority                     | Pennywise                     | 102 |
| Galway Girl                        | Ed Sheeran                    | 100 |
| Gente di mare                      | Umberto Tozzi                 | 87  |
| Gianna                             | Rino Gaetano                  | 106 |
| Glory Days                         | Bruce Springsteen             | 117 |
| Got The Time                       | Anthrax                       | 128 |
| Happy song                         | Bring me the horizon          | 86  |
| Head & Heart                       | Joel Corry feat. MNEK         | 123 |
| Hey Ya                             | Out Kast                      | 80  |
| Highway star                       | Deep purple                   | 174 |
| Highway to Hell                    | AC/DC                         | 116 |
| I just can't get enough            | Modern Rock Player            | 127 |

|                              |                                |     |
|------------------------------|--------------------------------|-----|
| I was made for loving'you    | Kiss                           | 128 |
| I Wish                       | Stevie Wonder                  | 106 |
| Il mio nome è nessuno        | Ennio Morricone                | 112 |
| Il posto dei santi           | Negramaro                      | 60  |
| I'm a believer               | Smash Mouth                    | 82  |
| Immigrant song               | Led Zeppelin                   | 113 |
| In the end                   | Linkin Park                    | 105 |
| I've got the fire            | Kissin' Dynamite               | 117 |
| Killing in the name on       | Rage against the machine       | 89  |
| La canzone del sole          | Lucio Battisti                 | 93  |
| La mia banda suona il rock   | Ivano Fossati                  | 106 |
| Last Train Home              | Pat Metheny Group              | 80  |
| Let there be rock            | AC/DC                          | 182 |
| Like a Rolling Stones (Live) | The rolling stones             | 103 |
| Living in America            | James Brown                    | 114 |
| Locked out of heaven         | Bruno Mars                     | 72  |
| Locomotive Breath            | Jethro Tull                    | 125 |
| L'ombelico del mondo         | Jovanotti                      | 110 |
| Lose Control                 | Meduza, Becky Hill, Goodboys   | 124 |
| Losing my religion           | R.E.M.                         | 63  |
| Losing my Religion           | R.E.M.                         | 63  |
| Love is Gone                 | David Guetta feat Chris Willis | 128 |
| Love the way you lie         | Eminem feat. Rihanna           | 87  |
| Lovefool                     | twocolors                      | 123 |
| Lucky man                    | The Verve                      | 76  |
| Margarita                    | Elodie feat. Marracash         | 96  |
| Metalingus                   | Alter Bridge                   | 110 |
| More than a feeling          | Boston                         | 109 |
| My Immortal                  | Evanescence                    | 79  |
| My plague                    | Slipknot                       | 89  |
| Nel letto di Lucia           | Rino Gaetano                   | 103 |

|                                            |                    |     |
|--------------------------------------------|--------------------|-----|
| New Year's Day                             | U2                 | 133 |
| No Easy Way Out                            | Rocky Soundtrack   | 126 |
| No Roots                                   | Alice Merton       | 116 |
| One step beyond                            | Madness            | 155 |
| One Step Beyond                            | Madness            | 155 |
| Paint it black                             | The rolling stones | 159 |
| Papaoutai                                  | Stromae            | 116 |
| Physical                                   | Dua Lipa           | 74  |
| Preachin' Blues                            | Larkin Poe         | 86  |
| Push the button                            | Sugababes          | 63  |
| Renegades                                  | X Ambassadors      | 90  |
| Rise today                                 | Alter Bridge       | 159 |
| Shock to the system                        | Billy Idol         | 85  |
| Should I stay or Should I go               | The Clash          | 113 |
| Smoke on the water                         | Deep purple        | 114 |
| Sonne                                      | Rammstein          | 75  |
| Stairway to Heaven                         | Led Zeppelin       | 82  |
| Starway to heaven                          | Studio Sound Group | 81  |
| Sugar                                      | Maroon 5           | 60  |
| Sweet child O'Mine                         | Guns N'Roses       | 125 |
| Tell me if you wanna go home               | Keira Knightley    | 72  |
| The final countdown                        | Europe             | 118 |
| The kids aren't alright                    | The Offspring      | 100 |
| Think                                      | Aretha Franklin    | 55  |
| Till I collapse                            | Eminem             | 86  |
| Too old to rock'n' Roll: too young to die! | Jethro Tull        | 75  |
| Umbrella                                   | Rihanna            | 87  |
| Walk this way                              | RUN-DMC            | 106 |
| We are the champions                       | Queen              | 95  |
| We will rock you                           | Queen              | 81  |
| Welcome to the Jungle                      | Guns N'Roses       | 124 |

|                  |              |     |
|------------------|--------------|-----|
| We're Gonna Win  | Bryan Adams  | 172 |
| Who made who     | AC/DC        | 125 |
| Whole Lotta Love | Led Zeppelin | 90  |
| Zitti e buoni    | Maneskin     | 103 |
